# Supplementary material
Source: PubMed Central journal article supplement (PMC6420054)
Supplement: NIHMS80151-supplement-Supplementary_Material.pdf [file NIHMS80151-supplement-Supplementary_Material.pdf]

**Supplementary Material**

**Table S1.** Experimentation percentages using adaptive weight function (assuming uniformly distributed DLT model).

| Arrival rate ( $\lambda$ ) | Design      | Probability of DLT (%) |       |       |       |     | Mean Sample Size | Mean DLTs (%) |
|----------------------------|-------------|------------------------|-------|-------|-------|-----|------------------|---------------|
|                            |             | 0-14                   | 15-24 | 25-34 | 35-45 | 46+ |                  |               |
| <i>Scenario A</i>          |             |                        |       |       |       |     |                  |               |
| 0.5                        | PIPE        | 20                     | 63    | 17    | -     | -   | 40.0             | 19            |
|                            | TITE-PIPE-C | 21                     | 63    | 16    | -     | -   | 40.0             | 19            |
|                            | TITE-PIPE-O | 23                     | 63    | 15    | -     | -   | 39.9             | 19            |
| 1                          | PIPE        | 20                     | 63    | 17    | -     | -   | 40.0             | 19            |
|                            | TITE-PIPE-C | 22                     | 62    | 15    | -     | -   | 39.9             | 19            |
|                            | TITE-PIPE-O | 26                     | 61    | 12    | -     | -   | 39.9             | 18            |
| 2                          | PIPE        | 20                     | 63    | 17    | -     | -   | 40.0             | 19            |
|                            | TITE-PIPE-C | 27                     | 60    | 13    | -     | -   | 39.9             | 18            |
|                            | TITE-PIPE-O | 34                     | 58    | 8     | -     | -   | 39.8             | 17            |
| <i>Scenario B</i>          |             |                        |       |       |       |     |                  |               |
| 0.5                        | PIPE        | 76                     | 24    | -     | -     | -   | 40.0             | 12            |
|                            | TITE-PIPE-C | 77                     | 23    | -     | -     | -   | 40.0             | 11            |
|                            | TITE-PIPE-O | 79                     | 21    | -     | -     | -   | 40.0             | 11            |
| 1                          | PIPE        | 76                     | 24    | -     | -     | -   | 40.0             | 12            |
|                            | TITE-PIPE-C | 79                     | 21    | -     | -     | -   | 40.0             | 11            |
|                            | TITE-PIPE-O | 83                     | 17    | -     | -     | -   | 40.0             | 11            |
| 2                          | PIPE        | 76                     | 24    | -     | -     | -   | 40.0             | 12            |
|                            | TITE-PIPE-C | 83                     | 17    | -     | -     | -   | 40.0             | 11            |
|                            | TITE-PIPE-O | 90                     | 10    | -     | -     | -   | 40.0             | 10            |
| <i>Scenario C</i>          |             |                        |       |       |       |     |                  |               |
| 0.5                        | PIPE        | 14                     | 15    | 27    | 33    | 11  | 39.5             | 31            |
|                            | TITE-PIPE-C | 14                     | 15    | 27    | 33    | 10  | 39.4             | 31            |
|                            | TITE-PIPE-O | 14                     | 15    | 28    | 33    | 10  | 39.0             | 31            |
| 1                          | PIPE        | 14                     | 15    | 27    | 33    | 11  | 39.5             | 31            |
|                            | TITE-PIPE-C | 15                     | 16    | 27    | 32    | 10  | 39.4             | 31            |
|                            | TITE-PIPE-O | 15                     | 16    | 28    | 31    | 8   | 38.9             | 30            |
| 2                          | PIPE        | 14                     | 15    | 27    | 33    | 11  | 39.5             | 31            |
|                            | TITE-PIPE-C | 18                     | 16    | 27    | 29    | 9   | 39.3             | 30            |
|                            | TITE-PIPE-O | 18                     | 18    | 29    | 28    | 6   | 38.7             | 29            |
| <i>Scenario D</i>          |             |                        |       |       |       |     |                  |               |
| 0.5                        | PIPE        | -                      | -     | -     | 57    | 43  | 19.4             | 61            |
|                            | TITE-PIPE-C | -                      | -     | -     | 60    | 40  | 19.4             | 61            |
|                            | TITE-PIPE-O | -                      | -     | -     | 61    | 39  | 19.2             | 61            |
| 1                          | PIPE        | -                      | -     | -     | 57    | 43  | 19.4             | 61            |
|                            | TITE-PIPE-C | -                      | -     | -     | 63    | 37  | 19.5             | 61            |
|                            | TITE-PIPE-O | -                      | -     | -     | 64    | 36  | 19.1             | 61            |
| 2                          | PIPE        | -                      | -     | -     | 57    | 43  | 19.4             | 61            |
|                            | TITE-PIPE-C | -                      | -     | -     | 66    | 34  | 19.4             | 61            |
|                            | TITE-PIPE-O | -                      | -     | -     | 68    | 32  | 18.9             | 61            |
| <i>Scenario E</i>          |             |                        |       |       |       |     |                  |               |
| 0.5                        | PIPE        | 30                     | 31    | 39    | 1     | -   | 39.8             | 21            |
|                            | TITE-PIPE-C | 30                     | 31    | 39    | 1     | -   | 39.8             | 21            |
|                            | TITE-PIPE-O | 32                     | 31    | 37    | 0     | -   | 39.7             | 21            |
| 1                          | PIPE        | 30                     | 31    | 39    | 1     | -   | 39.8             | 21            |
|                            | TITE-PIPE-C | 31                     | 31    | 38    | 0     | -   | 39.8             | 21            |
|                            | TITE-PIPE-O | 33                     | 31    | 35    | 0     | -   | 39.7             | 20            |
| 2                          | PIPE        | 30                     | 31    | 39    | 1     | -   | 39.8             | 21            |
|                            | TITE-PIPE-C | 33                     | 30    | 36    | 0     | -   | 39.7             | 20            |
|                            | TITE-PIPE-O | 37                     | 32    | 31    | 0     | -   | 39.6             | 19            |
| <i>Scenario F</i>          |             |                        |       |       |       |     |                  |               |
| 0.5                        | PIPE        | 20                     | 55    | -     | 14    | 11  | 39.5             | 25            |
|                            | TITE-PIPE-C | 21                     | 53    | -     | 14    | 11  | 39.4             | 25            |
|                            | TITE-PIPE-O | 22                     | 53    | -     | 14    | 10  | 39.3             | 25            |
| 1                          | PIPE        | 20                     | 55    | -     | 14    | 11  | 39.5             | 25            |
|                            | TITE-PIPE-C | 23                     | 52    | -     | 15    | 11  | 39.4             | 25            |
|                            | TITE-PIPE-O | 25                     | 52    | -     | 14    | 9   | 39.3             | 24            |
| 2                          | PIPE        | 20                     | 55    | -     | 14    | 11  | 39.5             | 25            |
|                            | TITE-PIPE-C | 27                     | 48    | -     | 14    | 10  | 39.4             | 24            |
|                            | TITE-PIPE-O | 31                     | 48    | -     | 14    | 6   | 39.1             | 23            |
| <i>Scenario G</i>          |             |                        |       |       |       |     |                  |               |
| 0.5                        | PIPE        | 38                     | 35    | 21    | 3     | 3   | 40.0             | 17            |
|                            | TITE-PIPE-C | 40                     | 35    | 20    | 3     | 2   | 40.0             | 17            |
|                            | TITE-PIPE-O | 42                     | 34    | 19    | 3     | 2   | 40.0             | 17            |
| 1                          | PIPE        | 38                     | 35    | 21    | 3     | 3   | 40.0             | 17            |
|                            | TITE-PIPE-C | 41                     | 34    | 19    | 3     | 2   | 40.0             | 17            |
|                            | TITE-PIPE-O | 45                     | 32    | 18    | 3     | 2   | 40.0             | 16            |
| 2                          | PIPE        | 38                     | 35    | 21    | 3     | 3   | 40.0             | 17            |
|                            | TITE-PIPE-C | 46                     | 33    | 17    | 3     | 2   | 40.0             | 16            |
|                            | TITE-PIPE-O | 52                     | 30    | 15    | 2     | 1   | 40.0             | 14            |

**Table S2.** Recommendation percentages using adaptive weight function (assuming uniformly distributed DLT model).

| Arrival rate ( $\lambda$ ) | Design      | Probability of DLT (%) |       |       |       |     | Mean No. MTDCs | Trials with no MTDC (%) | Trials that stopped early (%) |
|----------------------------|-------------|------------------------|-------|-------|-------|-----|----------------|-------------------------|-------------------------------|
|                            |             | 0-14                   | 15-24 | 25-34 | 35-45 | 46+ |                |                         |                               |
| <i>Scenario A</i>          |             |                        |       |       |       |     |                |                         |                               |
| 0.5                        | PIPE        | 12                     | 73    | 15    | -     | -   | 2.3            | 0.2                     | 0.2                           |
|                            | TITE-PIPE-C | 11                     | 74    | 14    | -     | -   | 2.2            | 0.2                     | 0.2                           |
|                            | TITE-PIPE-O | 11                     | 75    | 14    | -     | -   | 2.2            | 0.2                     | 0.2                           |
| 1                          | PIPE        | 12                     | 73    | 15    | -     | -   | 2.3            | 0.2                     | 0.2                           |
|                            | TITE-PIPE-C | 11                     | 74    | 14    | -     | -   | 2.2            | 0.3                     | 0.3                           |
|                            | TITE-PIPE-O | 12                     | 75    | 14    | -     | -   | 2.2            | 0.4                     | 0.3                           |
| 2                          | PIPE        | 12                     | 73    | 15    | -     | -   | 2.3            | 0.2                     | 0.2                           |
|                            | TITE-PIPE-C | 12                     | 74    | 14    | -     | -   | 2.2            | 0.5                     | 0.4                           |
|                            | TITE-PIPE-O | 12                     | 76    | 12    | -     | -   | 2.2            | 0.9                     | 0.8                           |
| <i>Scenario B</i>          |             |                        |       |       |       |     |                |                         |                               |
| 0.5                        | PIPE        | 73                     | 27    | -     | -     | -   | 1.9            | 0                       | 0                             |
|                            | TITE-PIPE-C | 73                     | 27    | -     | -     | -   | 1.9            | 0                       | 0                             |
|                            | TITE-PIPE-O | 73                     | 27    | -     | -     | -   | 1.9            | 0.1                     | 0.1                           |
| 1                          | PIPE        | 73                     | 27    | -     | -     | -   | 1.9            | 0                       | 0                             |
|                            | TITE-PIPE-C | 74                     | 26    | -     | -     | -   | 1.9            | 0                       | 0                             |
|                            | TITE-PIPE-O | 76                     | 24    | -     | -     | -   | 2.0            | 0                       | 0                             |
| 2                          | PIPE        | 73                     | 27    | -     | -     | -   | 1.9            | 0                       | 0                             |
|                            | TITE-PIPE-C | 77                     | 23    | -     | -     | -   | 2.0            | 0                       | 0                             |
|                            | TITE-PIPE-O | 82                     | 18    | -     | -     | -   | 2.1            | 0                       | 0                             |
| <i>Scenario C</i>          |             |                        |       |       |       |     |                |                         |                               |
| 0.5                        | PIPE        | 16                     | 24    | 35    | 19    | 1   | 1.3            | 4.5                     | 2.1                           |
|                            | TITE-PIPE-C | 16                     | 24    | 34    | 20    | 1   | 1.3            | 4.9                     | 2.8                           |
|                            | TITE-PIPE-O | 15                     | 22    | 34    | 20    | 2   | 1.3            | 6.8                     | 4.5                           |
| 1                          | PIPE        | 16                     | 24    | 35    | 19    | 1   | 1.3            | 4.5                     | 2.1                           |
|                            | TITE-PIPE-C | 14                     | 24    | 35    | 20    | 2   | 1.3            | 5.4                     | 3.1                           |
|                            | TITE-PIPE-O | 14                     | 22    | 34    | 21    | 1   | 1.3            | 8.0                     | 5.3                           |
| 2                          | PIPE        | 16                     | 24    | 35    | 19    | 1   | 1.3            | 4.5                     | 2.1                           |
|                            | TITE-PIPE-C | 13                     | 23    | 33    | 22    | 2   | 1.2            | 7.3                     | 3.8                           |
|                            | TITE-PIPE-O | 13                     | 23    | 32    | 22    | 2   | 1.2            | 8.8                     | 5.8                           |
| <i>Scenario D</i>          |             |                        |       |       |       |     |                |                         |                               |
| 0.5                        | PIPE        | -                      | -     | -     | 3     | 2   | 0              | 95.8                    | 87.2                          |
|                            | TITE-PIPE-C | -                      | -     | -     | 2     | 1   | 0              | 96.3                    | 87.5                          |
|                            | TITE-PIPE-O | -                      | -     | -     | 2     | 2   | 0              | 96.2                    | 88.0                          |
| 1                          | PIPE        | -                      | -     | -     | 3     | 2   | 0              | 95.8                    | 87.2                          |
|                            | TITE-PIPE-C | -                      | -     | -     | 2     | 1   | 0              | 96.2                    | 87.0                          |
|                            | TITE-PIPE-O | -                      | -     | -     | 2     | 2   | 0              | 96.8                    | 87.8                          |
| 2                          | PIPE        | -                      | -     | -     | 3     | 2   | 0              | 95.8                    | 87.2                          |
|                            | TITE-PIPE-C | -                      | -     | -     | 2     | 2   | 0              | 96.4                    | 86.7                          |
|                            | TITE-PIPE-O | -                      | -     | -     | 2     | 1   | 0              | 97.2                    | 87.7                          |
| <i>Scenario E</i>          |             |                        |       |       |       |     |                |                         |                               |
| 0.5                        | PIPE        | 30                     | 32    | 37    | 0     | -   | 2              | 0.9                     | 0.7                           |
|                            | TITE-PIPE-C | 30                     | 32    | 37    | 0     | -   | 2              | 0.9                     | 0.8                           |
|                            | TITE-PIPE-O | 30                     | 32    | 37    | 0     | -   | 2              | 1.1                     | 1.0                           |
| 1                          | PIPE        | 30                     | 32    | 37    | 0     | -   | 2              | 0.9                     | 0.7                           |
|                            | TITE-PIPE-C | 30                     | 31    | 38    | 0     | -   | 2              | 0.8                     | 0.6                           |
|                            | TITE-PIPE-O | 30                     | 33    | 36    | 0     | -   | 2              | 1.2                     | 1.1                           |
| 2                          | PIPE        | 30                     | 32    | 37    | 0     | -   | 2              | 0.9                     | 0.7                           |
|                            | TITE-PIPE-C | 30                     | 32    | 37    | 0     | -   | 2              | 1.2                     | 1.1                           |
|                            | TITE-PIPE-O | 32                     | 33    | 33    | 0     | -   | 2              | 1.7                     | 1.8                           |
| <i>Scenario F</i>          |             |                        |       |       |       |     |                |                         |                               |
| 0.5                        | PIPE        | 13                     | 70    | -     | 11    | 4   | 1.7            | 2.1                     | 1.6                           |
|                            | TITE-PIPE-C | 12                     | 71    | -     | 11    | 4   | 1.7            | 2.0                     | 1.6                           |
|                            | TITE-PIPE-O | 12                     | 70    | -     | 11    | 4   | 1.7            | 2.8                     | 2.6                           |
| 1                          | PIPE        | 13                     | 70    | -     | 11    | 4   | 1.7            | 2.1                     | 1.6                           |
|                            | TITE-PIPE-C | 12                     | 71    | -     | 10    | 4   | 1.7            | 2.7                     | 1.9                           |
|                            | TITE-PIPE-O | 12                     | 71    | -     | 10    | 4   | 1.7            | 3.2                     | 2.7                           |
| 2                          | PIPE        | 13                     | 70    | -     | 11    | 4   | 1.7            | 2.1                     | 1.6                           |
|                            | TITE-PIPE-C | 12                     | 70    | -     | 11    | 4   | 1.7            | 3.3                     | 2.0                           |
|                            | TITE-PIPE-O | 12                     | 70    | -     | 10    | 3   | 1.6            | 5.2                     | 3.6                           |
| <i>Scenario G</i>          |             |                        |       |       |       |     |                |                         |                               |
| 0.5                        | PIPE        | 44                     | 38    | 17    | 1     | 0   | 2.7            | 0                       | 0                             |
|                            | TITE-PIPE-C | 45                     | 37    | 17    | 1     | 0   | 2.7            | 0                       | 0                             |
|                            | TITE-PIPE-O | 44                     | 37    | 17    | 1     | 0   | 2.7            | 0.2                     | 0.2                           |
| 1                          | PIPE        | 44                     | 38    | 17    | 1     | 0   | 2.7            | 0                       | 0                             |
|                            | TITE-PIPE-C | 45                     | 37    | 17    | 1     | 0   | 2.7            | 0                       | 0                             |
|                            | TITE-PIPE-O | 44                     | 36    | 18    | 1     | 0   | 2.7            | 0                       | 0                             |
| 2                          | PIPE        | 44                     | 38    | 17    | 1     | 0   | 2.7            | 0                       | 0                             |
|                            | TITE-PIPE-C | 44                     | 36    | 18    | 1     | 1   | 2.7            | 0                       | 0                             |
|                            | TITE-PIPE-O | 44                     | 38    | 17    | 1     | 1   | 2.7            | 0                       | 0.2                           |

**Table S3.** Experimentation percentages using uniform weight function (assuming Pareto distributed DLT model).

| Arrival rate ( $\lambda$ ) | Design      | Probability of DLT (%) |       |       |       |     | Mean Sample Size | Mean DLTs (%) |
|----------------------------|-------------|------------------------|-------|-------|-------|-----|------------------|---------------|
|                            |             | 0-14                   | 15-24 | 25-34 | 35-45 | 46+ |                  |               |
| <i>Scenario A</i>          |             |                        |       |       |       |     |                  |               |
| 0.5                        | PIPE        | 20                     | 63    | 17    | -     | -   | 40.0             | 20            |
|                            | TITE-PIPE-C | 21                     | 62    | 16    | -     | -   | 39.9             | 19            |
|                            | TITE-PIPE-O | 24                     | 62    | 14    | -     | -   | 39.9             | 19            |
| 1                          | PIPE        | 20                     | 63    | 17    | -     | -   | 40.0             | 20            |
|                            | TITE-PIPE-C | 23                     | 62    | 15    | -     | -   | 39.9             | 19            |
|                            | TITE-PIPE-O | 27                     | 61    | 12    | -     | -   | 39.9             | 18            |
| 2                          | PIPE        | 20                     | 63    | 17    | -     | -   | 40.0             | 20            |
|                            | TITE-PIPE-C | 27                     | 60    | 13    | -     | -   | 39.9             | 18            |
|                            | TITE-PIPE-O | 35                     | 58    | 7     | -     | -   | 39.9             | 17            |
| <i>Scenario B</i>          |             |                        |       |       |       |     |                  |               |
| 0.5                        | PIPE        | 76                     | 24    | -     | -     | -   | 40.0             | 12            |
|                            | TITE-PIPE-C | 77                     | 23    | -     | -     | -   | 40.0             | 11            |
|                            | TITE-PIPE-O | 80                     | 20    | -     | -     | -   | 40.0             | 11            |
| 1                          | PIPE        | 76                     | 24    | -     | -     | -   | 40.0             | 12            |
|                            | TITE-PIPE-C | 79                     | 21    | -     | -     | -   | 40.0             | 11            |
|                            | TITE-PIPE-O | 84                     | 16    | -     | -     | -   | 40.0             | 11            |
| 2                          | PIPE        | 76                     | 24    | -     | -     | -   | 40.0             | 12            |
|                            | TITE-PIPE-C | 84                     | 16    | -     | -     | -   | 40.0             | 11            |
|                            | TITE-PIPE-O | 91                     | 9     | -     | -     | -   | 40.0             | 10            |
| <i>Scenario C</i>          |             |                        |       |       |       |     |                  |               |
| 0.5                        | PIPE        | 14                     | 15    | 28    | 33    | 11  | 39.4             | 32            |
|                            | TITE-PIPE-C | 15                     | 16    | 27    | 32    | 10  | 39.4             | 31            |
|                            | TITE-PIPE-O | 14                     | 16    | 28    | 32    | 9   | 39.2             | 31            |
| 1                          | PIPE        | 14                     | 15    | 28    | 33    | 11  | 39.4             | 32            |
|                            | TITE-PIPE-C | 15                     | 16    | 27    | 31    | 10  | 39.4             | 31            |
|                            | TITE-PIPE-O | 16                     | 17    | 29    | 31    | 8   | 39.2             | 30            |
| 2                          | PIPE        | 14                     | 15    | 28    | 33    | 11  | 39.4             | 32            |
|                            | TITE-PIPE-C | 19                     | 16    | 27    | 29    | 9   | 39.3             | 30            |
|                            | TITE-PIPE-O | 19                     | 18    | 29    | 28    | 6   | 39.2             | 28            |
| <i>Scenario D</i>          |             |                        |       |       |       |     |                  |               |
| 0.5                        | PIPE        | -                      | -     | -     | 58    | 42  | 19.5             | 61            |
|                            | TITE-PIPE-C | -                      | -     | -     | 61    | 39  | 19.6             | 60            |
|                            | TITE-PIPE-O | -                      | -     | -     | 62    | 38  | 19.4             | 60            |
| 1                          | PIPE        | -                      | -     | -     | 58    | 42  | 19.5             | 61            |
|                            | TITE-PIPE-C | -                      | -     | -     | 64    | 36  | 19.6             | 60            |
|                            | TITE-PIPE-O | -                      | -     | -     | 65    | 35  | 19.2             | 60            |
| 2                          | PIPE        | -                      | -     | -     | 58    | 42  | 19.5             | 61            |
|                            | TITE-PIPE-C | -                      | -     | -     | 67    | 33  | 19.4             | 60            |
|                            | TITE-PIPE-O | -                      | -     | -     | 69    | 31  | 18.8             | 60            |
| <i>Scenario E</i>          |             |                        |       |       |       |     |                  |               |
| 0.5                        | PIPE        | 30                     | 31    | 38    | 1     | -   | 39.8             | 21            |
|                            | TITE-PIPE-C | 30                     | 31    | 38    | 0     | -   | 39.8             | 21            |
|                            | TITE-PIPE-O | 32                     | 31    | 37    | 0     | -   | 39.7             | 21            |
| 1                          | PIPE        | 30                     | 31    | 38    | 1     | -   | 39.8             | 21            |
|                            | TITE-PIPE-C | 31                     | 31    | 38    | 0     | -   | 39.8             | 21            |
|                            | TITE-PIPE-O | 34                     | 31    | 34    | 0     | -   | 39.7             | 20            |
| 2                          | PIPE        | 30                     | 31    | 38    | 1     | -   | 39.8             | 21            |
|                            | TITE-PIPE-C | 33                     | 31    | 36    | 0     | -   | 39.8             | 20            |
|                            | TITE-PIPE-O | 38                     | 32    | 30    | 0     | -   | 39.6             | 19            |
| <i>Scenario F</i>          |             |                        |       |       |       |     |                  |               |
| 0.5                        | PIPE        | 21                     | 55    | -     | 14    | 11  | 39.6             | 25            |
|                            | TITE-PIPE-C | 22                     | 53    | -     | 14    | 11  | 39.6             | 25            |
|                            | TITE-PIPE-O | 23                     | 54    | -     | 14    | 10  | 39.5             | 25            |
| 1                          | PIPE        | 21                     | 55    | -     | 14    | 11  | 39.6             | 25            |
|                            | TITE-PIPE-C | 24                     | 52    | -     | 14    | 10  | 39.5             | 25            |
|                            | TITE-PIPE-O | 26                     | 52    | -     | 14    | 9   | 39.5             | 24            |
| 2                          | PIPE        | 21                     | 55    | -     | 14    | 11  | 39.6             | 25            |
|                            | TITE-PIPE-C | 28                     | 48    | -     | 14    | 10  | 39.5             | 24            |
|                            | TITE-PIPE-O | 32                     | 49    | -     | 14    | 6   | 39.5             | 23            |
| <i>Scenario G</i>          |             |                        |       |       |       |     |                  |               |
| 0.5                        | PIPE        | 38                     | 35    | 20    | 3     | 3   | 40.0             | 17            |
|                            | TITE-PIPE-C | 40                     | 35    | 20    | 3     | 2   | 40.0             | 17            |
|                            | TITE-PIPE-O | 42                     | 34    | 19    | 3     | 2   | 40.0             | 17            |
| 1                          | PIPE        | 38                     | 35    | 20    | 3     | 3   | 40.0             | 17            |
|                            | TITE-PIPE-C | 41                     | 35    | 19    | 3     | 2   | 40.0             | 17            |
|                            | TITE-PIPE-O | 45                     | 33    | 17    | 2     | 2   | 40.0             | 16            |
| 2                          | PIPE        | 38                     | 35    | 20    | 3     | 3   | 40.0             | 17            |
|                            | TITE-PIPE-C | 46                     | 33    | 17    | 2     | 2   | 40.0             | 15            |
|                            | TITE-PIPE-O | 53                     | 30    | 14    | 2     | 1   | 40.0             | 14            |

**Table S4.** Recommendation percentages using uniform weight function (assuming Pareto distributed DLT model).

| Arrival rate ( $\lambda$ ) | Design      | Probability of DLT (%) |       |       |       |     | Mean No. MTDCs | Trials with no MTDC (%) | Trials that stopped early (%) |
|----------------------------|-------------|------------------------|-------|-------|-------|-----|----------------|-------------------------|-------------------------------|
|                            |             | 0-14                   | 15-24 | 25-34 | 35-45 | 46+ |                |                         |                               |
| <i>Scenario A</i>          |             |                        |       |       |       |     |                |                         |                               |
| 0.5                        | PIPE        | 11                     | 75    | 14    | -     | -   | 2.2            | 0.2                     | 0.2                           |
|                            | TITE-PIPE-C | 11                     | 75    | 14    | -     | -   | 2.3            | 0.2                     | 0.2                           |
|                            | TITE-PIPE-O | 12                     | 75    | 13    | -     | -   | 2.2            | 0.2                     | 0.2                           |
| 1                          | PIPE        | 11                     | 75    | 14    | -     | -   | 2.2            | 0.2                     | 0.2                           |
|                            | TITE-PIPE-C | 11                     | 75    | 14    | -     | -   | 2.2            | 0.3                     | 0.2                           |
|                            | TITE-PIPE-O | 12                     | 74    | 14    | -     | -   | 2.2            | 0.4                     | 0.4                           |
| 2                          | PIPE        | 11                     | 75    | 14    | -     | -   | 2.2            | 0.2                     | 0.2                           |
|                            | TITE-PIPE-C | 11                     | 74    | 14    | -     | -   | 2.2            | 0.6                     | 0.3                           |
|                            | TITE-PIPE-O | 13                     | 76    | 11    | -     | -   | 2.2            | 0.8                     | 0.4                           |
| <i>Scenario B</i>          |             |                        |       |       |       |     |                |                         |                               |
| 0.5                        | PIPE        | 73                     | 27    | -     | -     | -   | 1.9            | 0                       | 0                             |
|                            | TITE-PIPE-C | 73                     | 27    | -     | -     | -   | 1.9            | 0                       | 0                             |
|                            | TITE-PIPE-O | 74                     | 26    | -     | -     | -   | 1.9            | 0                       | 0                             |
| 1                          | PIPE        | 73                     | 27    | -     | -     | -   | 1.9            | 0                       | 0                             |
|                            | TITE-PIPE-C | 75                     | 25    | -     | -     | -   | 1.9            | 0                       | 0                             |
|                            | TITE-PIPE-O | 77                     | 23    | -     | -     | -   | 2.0            | 0                       | 0                             |
| 2                          | PIPE        | 73                     | 27    | -     | -     | -   | 1.9            | 0                       | 0                             |
|                            | TITE-PIPE-C | 78                     | 22    | -     | -     | -   | 2.0            | 0                       | 0                             |
|                            | TITE-PIPE-O | 82                     | 17    | -     | -     | -   | 2.1            | 0.1                     | 0                             |
| <i>Scenario C</i>          |             |                        |       |       |       |     |                |                         |                               |
| 0.5                        | PIPE        | 14                     | 24    | 35    | 19    | 2   | 1.3            | 6.2                     | 3.2                           |
|                            | TITE-PIPE-C | 14                     | 24    | 35    | 20    | 1   | 1.3            | 5.8                     | 3.0                           |
|                            | TITE-PIPE-O | 14                     | 24    | 33    | 21    | 1   | 1.3            | 6.8                     | 3.9                           |
| 1                          | PIPE        | 14                     | 24    | 35    | 19    | 2   | 1.3            | 6.2                     | 3.2                           |
|                            | TITE-PIPE-C | 14                     | 24    | 34    | 21    | 1   | 1.3            | 5.5                     | 3.2                           |
|                            | TITE-PIPE-O | 16                     | 22    | 33    | 20    | 2   | 1.3            | 6.7                     | 3.8                           |
| 2                          | PIPE        | 14                     | 24    | 35    | 19    | 2   | 1.3            | 6.2                     | 3.2                           |
|                            | TITE-PIPE-C | 13                     | 22    | 34    | 23    | 2   | 1.3            | 7.0                     | 3.9                           |
|                            | TITE-PIPE-O | 14                     | 21    | 33    | 21    | 3   | 1.2            | 7.8                     | 4.2                           |
| <i>Scenario D</i>          |             |                        |       |       |       |     |                |                         |                               |
| 0.5                        | PIPE        | -                      | -     | -     | 3     | 2   | 0              | 96.0                    | 88.4                          |
|                            | TITE-PIPE-C | -                      | -     | -     | 2     | 1   | 0              | 96.4                    | 88.0                          |
|                            | TITE-PIPE-O | -                      | -     | -     | 2     | 1   | 0              | 96.6                    | 88.0                          |
| 1                          | PIPE        | -                      | -     | -     | 3     | 2   | 0              | 96.0                    | 88.4                          |
|                            | TITE-PIPE-C | -                      | -     | -     | 2     | 1   | 0              | 96.6                    | 87.2                          |
|                            | TITE-PIPE-O | -                      | -     | -     | 1     | 1   | 0              | 97.2                    | 87.8                          |
| 2                          | PIPE        | -                      | -     | -     | 3     | 2   | 0              | 96.0                    | 88.4                          |
|                            | TITE-PIPE-C | -                      | -     | -     | 2     | 1   | 0              | 97.2                    | 88.2                          |
|                            | TITE-PIPE-O | -                      | -     | -     | 2     | 1   | 0              | 97.7                    | 89.1                          |
| <i>Scenario E</i>          |             |                        |       |       |       |     |                |                         |                               |
| 0.5                        | PIPE        | 30                     | 32    | 37    | 0     | -   | 2.1            | 1.0                     | 0.7                           |
|                            | TITE-PIPE-C | 30                     | 32    | 37    | 0     | -   | 2.1            | 0.8                     | 0.8                           |
|                            | TITE-PIPE-O | 31                     | 32    | 36    | 0     | -   | 2.0            | 1.2                     | 1.1                           |
| 1                          | PIPE        | 30                     | 32    | 37    | 0     | -   | 2.1            | 1.0                     | 0.7                           |
|                            | TITE-PIPE-C | 30                     | 32    | 37    | 0     | -   | 2.0            | 1.1                     | 0.9                           |
|                            | TITE-PIPE-O | 31                     | 32    | 35    | 0     | -   | 2.0            | 1.6                     | 1.2                           |
| 2                          | PIPE        | 30                     | 32    | 37    | 0     | -   | 2.1            | 1.0                     | 0.7                           |
|                            | TITE-PIPE-C | 30                     | 32    | 37    | 0     | -   | 2.0            | 1.2                     | 0.9                           |
|                            | TITE-PIPE-O | 32                     | 33    | 33    | 0     | -   | 2.0            | 2.5                     | 1.8                           |
| <i>Scenario F</i>          |             |                        |       |       |       |     |                |                         |                               |
| 0.5                        | PIPE        | 12                     | 72    | -     | 10    | 4   | 1.7            | 1.8                     | 1.3                           |
|                            | TITE-PIPE-C | 12                     | 72    | -     | 10    | 4   | 1.7            | 2.1                     | 1.4                           |
|                            | TITE-PIPE-O | 12                     | 71    | -     | 11    | 3   | 1.7            | 2.9                     | 1.9                           |
| 1                          | PIPE        | 12                     | 72    | -     | 10    | 4   | 1.7            | 1.8                     | 1.3                           |
|                            | TITE-PIPE-C | 12                     | 72    | -     | 10    | 3   | 1.7            | 2.5                     | 1.8                           |
|                            | TITE-PIPE-O | 13                     | 70    | -     | 10    | 5   | 1.7            | 2.5                     | 1.6                           |
| 2                          | PIPE        | 12                     | 72    | -     | 10    | 4   | 1.7            | 1.8                     | 1.4                           |
|                            | TITE-PIPE-C | 12                     | 71    | -     | 9     | 3   | 1.7            | 3.7                     | 2.1                           |
|                            | TITE-PIPE-O | 13                     | 69    | -     | 10    | 4   | 1.6            | 4.3                     | 2.0                           |
| <i>Scenario G</i>          |             |                        |       |       |       |     |                |                         |                               |
| 0.5                        | PIPE        | 45                     | 38    | 16    | 1     | 0   | 2.8            | 0                       | 0                             |
|                            | TITE-PIPE-C | 45                     | 37    | 17    | 1     | 1   | 2.7            | 0                       | 0                             |
|                            | TITE-PIPE-O | 44                     | 37    | 17    | 1     | 1   | 2.7            | 0                       | 0                             |
| 1                          | PIPE        | 45                     | 38    | 16    | 1     | 0   | 2.8            | 0                       | 0                             |
|                            | TITE-PIPE-C | 44                     | 38    | 17    | 1     | 0   | 2.7            | 0                       | 0                             |
|                            | TITE-PIPE-O | 44                     | 37    | 17    | 1     | 1   | 2.7            | 0                       | 0                             |
| 2                          | PIPE        | 45                     | 38    | 16    | 1     | 0   | 2.8            | 0                       | 0                             |
|                            | TITE-PIPE-C | 44                     | 36    | 18    | 1     | 0   | 2.7            | 0                       | 0                             |
|                            | TITE-PIPE-O | 46                     | 36    | 16    | 1     | 1   | 2.7            | 0                       | 0                             |

**Table S5.** Experimentation percentages using adaptive weight function (assuming Pareto distributed DLT model).

| Arrival rate ( $\lambda$ ) | Design      | Probability of DLT (%) |       |       |       |     | Mean Sample Size | Mean DLTs (%) |
|----------------------------|-------------|------------------------|-------|-------|-------|-----|------------------|---------------|
|                            |             | 0-14                   | 15-24 | 25-34 | 35-45 | 46+ |                  |               |
| <i>Scenario A</i>          |             |                        |       |       |       |     |                  |               |
| 0.5                        | PIPE        | 20                     | 63    | 17    | -     | -   | 40.0             | 20            |
|                            | TITE-PIPE-C | 21                     | 62    | 16    | -     | -   | 39.9             | 19            |
|                            | TITE-PIPE-O | 23                     | 62    | 15    | -     | -   | 39.9             | 19            |
| 1                          | PIPE        | 20                     | 63    | 17    | -     | -   | 40.0             | 20            |
|                            | TITE-PIPE-C | 23                     | 62    | 15    | -     | -   | 39.9             | 19            |
|                            | TITE-PIPE-O | 27                     | 61    | 12    | -     | -   | 39.9             | 18            |
| 2                          | PIPE        | 20                     | 63    | 17    | -     | -   | 40.0             | 20            |
|                            | TITE-PIPE-C | 27                     | 60    | 13    | -     | -   | 39.9             | 18            |
|                            | TITE-PIPE-O | 34                     | 58    | 8     | -     | -   | 39.9             | 17            |
| <i>Scenario B</i>          |             |                        |       |       |       |     |                  |               |
| 0.5                        | PIPE        | 76                     | 24    | -     | -     | -   | 40.0             | 12            |
|                            | TITE-PIPE-C | 77                     | 23    | -     | -     | -   | 40.0             | 11            |
|                            | TITE-PIPE-O | 80                     | 20    | -     | -     | -   | 40.0             | 11            |
| 1                          | PIPE        | 76                     | 24    | -     | -     | -   | 40.0             | 12            |
|                            | TITE-PIPE-C | 78                     | 22    | -     | -     | -   | 40.0             | 11            |
|                            | TITE-PIPE-O | 84                     | 16    | -     | -     | -   | 40.0             | 11            |
| 2                          | PIPE        | 76                     | 24    | -     | -     | -   | 40.0             | 12            |
|                            | TITE-PIPE-C | 83                     | 17    | -     | -     | -   | 40.0             | 11            |
|                            | TITE-PIPE-O | 91                     | 9     | -     | -     | -   | 40.0             | 10            |
| <i>Scenario C</i>          |             |                        |       |       |       |     |                  |               |
| 0.5                        | PIPE        | 14                     | 15    | 28    | 33    | 11  | 39.4             | 32            |
|                            | TITE-PIPE-C | 14                     | 16    | 28    | 32    | 10  | 39.4             | 31            |
|                            | TITE-PIPE-O | 14                     | 16    | 28    | 32    | 9   | 39.1             | 31            |
| 1                          | PIPE        | 14                     | 15    | 28    | 33    | 11  | 39.4             | 32            |
|                            | TITE-PIPE-C | 15                     | 16    | 27    | 31    | 10  | 39.4             | 31            |
|                            | TITE-PIPE-O | 16                     | 16    | 28    | 31    | 8   | 38.9             | 30            |
| 2                          | PIPE        | 14                     | 15    | 28    | 33    | 11  | 39.4             | 32            |
|                            | TITE-PIPE-C | 18                     | 16    | 27    | 29    | 10  | 39.3             | 30            |
|                            | TITE-PIPE-O | 19                     | 18    | 29    | 29    | 6   | 38.9             | 29            |
| <i>Scenario D</i>          |             |                        |       |       |       |     |                  |               |
| 0.5                        | PIPE        | -                      | -     | -     | 58    | 42  | 19.5             | 61            |
|                            | TITE-PIPE-C | -                      | -     | -     | 61    | 39  | 19.5             | 61            |
|                            | TITE-PIPE-O | -                      | -     | -     | 61    | 39  | 19.4             | 60            |
| 1                          | PIPE        | -                      | -     | -     | 58    | 42  | 19.5             | 61            |
|                            | TITE-PIPE-C | -                      | -     | -     | 63    | 37  | 19.5             | 60            |
|                            | TITE-PIPE-O | -                      | -     | -     | 64    | 36  | 19.2             | 60            |
| 2                          | PIPE        | -                      | -     | -     | 58    | 42  | 19.5             | 61            |
|                            | TITE-PIPE-C | -                      | -     | -     | 67    | 33  | 19.3             | 60            |
|                            | TITE-PIPE-O | -                      | -     | -     | 68    | 32  | 18.7             | 60            |
| <i>Scenario E</i>          |             |                        |       |       |       |     |                  |               |
| 0.5                        | PIPE        | 30                     | 31    | 38    | 1     | -   | 39.8             | 21            |
|                            | TITE-PIPE-C | 31                     | 31    | 38    | 0     | -   | 39.8             | 21            |
|                            | TITE-PIPE-O | 32                     | 31    | 37    | 0     | -   | 39.7             | 21            |
| 1                          | PIPE        | 30                     | 31    | 38    | 1     | -   | 39.8             | 21            |
|                            | TITE-PIPE-C | 31                     | 31    | 38    | 0     | -   | 39.8             | 21            |
|                            | TITE-PIPE-O | 34                     | 31    | 35    | 0     | -   | 39.7             | 20            |
| 2                          | PIPE        | 30                     | 31    | 38    | 1     | -   | 39.8             | 21            |
|                            | TITE-PIPE-C | 33                     | 31    | 36    | 0     | -   | 39.8             | 20            |
|                            | TITE-PIPE-O | 38                     | 32    | 30    | 0     | -   | 39.5             | 19            |
| <i>Scenario F</i>          |             |                        |       |       |       |     |                  |               |
| 0.5                        | PIPE        | 21                     | 55    | -     | 14    | 11  | 39.6             | 25            |
|                            | TITE-PIPE-C | 22                     | 53    | -     | 14    | 11  | 39.6             | 25            |
|                            | TITE-PIPE-O | 22                     | 54    | -     | 14    | 10  | 39.5             | 24            |
| 1                          | PIPE        | 21                     | 55    | -     | 14    | 11  | 39.6             | 25            |
|                            | TITE-PIPE-C | 24                     | 52    | -     | 14    | 10  | 39.5             | 25            |
|                            | TITE-PIPE-O | 25                     | 52    | -     | 14    | 9   | 39.4             | 24            |
| 2                          | PIPE        | 21                     | 55    | -     | 14    | 11  | 39.6             | 25            |
|                            | TITE-PIPE-C | 28                     | 48    | -     | 14    | 10  | 39.5             | 24            |
|                            | TITE-PIPE-O | 31                     | 49    | -     | 14    | 6   | 39.3             | 23            |
| <i>Scenario G</i>          |             |                        |       |       |       |     |                  |               |
| 0.5                        | PIPE        | 38                     | 35    | 20    | 3     | 3   | 40.0             | 17            |
|                            | TITE-PIPE-C | 40                     | 35    | 20    | 3     | 3   | 40.0             | 17            |
|                            | TITE-PIPE-O | 41                     | 34    | 19    | 3     | 2   | 40.0             | 17            |
| 1                          | PIPE        | 38                     | 35    | 20    | 3     | 3   | 40.0             | 17            |
|                            | TITE-PIPE-C | 42                     | 34    | 19    | 3     | 2   | 40.0             | 17            |
|                            | TITE-PIPE-O | 46                     | 33    | 17    | 2     | 2   | 40.0             | 16            |
| 2                          | PIPE        | 38                     | 35    | 20    | 3     | 3   | 40.0             | 17            |
|                            | TITE-PIPE-C | 46                     | 33    | 17    | 2     | 2   | 40.0             | 16            |
|                            | TITE-PIPE-O | 53                     | 30    | 14    | 2     | 1   | 40.0             | 14            |

**Table S6.** Recommendation percentages using adaptive weight function (assuming Pareto distributed DLT model).

| Arrival rate ( $\lambda$ ) | Design      | Probability of DLT (%) |       |       |       |     | Mean No. MTDCs | Trials with no MTDC (%) | Trials that stopped early (%) |
|----------------------------|-------------|------------------------|-------|-------|-------|-----|----------------|-------------------------|-------------------------------|
|                            |             | 0-14                   | 15-24 | 25-34 | 35-45 | 46+ |                |                         |                               |
| <i>Scenario A</i>          |             |                        |       |       |       |     |                |                         |                               |
| 0.5                        | PIPE        | 11                     | 75    | 14    | -     | -   | 2.2            | 0.2                     | 0.2                           |
|                            | TITE-PIPE-C | 11                     | 75    | 14    | -     | -   | 2.2            | 0.2                     | 0.2                           |
|                            | TITE-PIPE-O | 12                     | 74    | 14    | -     | -   | 2.2            | 0.3                     | 0.2                           |
| 1                          | PIPE        | 11                     | 75    | 14    | -     | -   | 2.2            | 0.2                     | 0.2                           |
|                            | TITE-PIPE-C | 11                     | 75    | 14    | -     | -   | 2.2            | 0.2                     | 0.2                           |
|                            | TITE-PIPE-O | 12                     | 74    | 14    | -     | -   | 2.2            | 0.5                     | 0.4                           |
| 2                          | PIPE        | 11                     | 75    | 14    | -     | -   | 2.2            | 0.2                     | 0.2                           |
|                            | TITE-PIPE-C | 11                     | 74    | 14    | -     | -   | 2.2            | 0.5                     | 0.3                           |
|                            | TITE-PIPE-O | 12                     | 76    | 11    | -     | -   | 2.2            | 0.4                     | 0.5                           |
| <i>Scenario B</i>          |             |                        |       |       |       |     |                |                         |                               |
| 0.5                        | PIPE        | 73                     | 27    | -     | -     | -   | 1.9            | 0                       | 0                             |
|                            | TITE-PIPE-C | 74                     | 26    | -     | -     | -   | 1.9            | 0                       | 0                             |
|                            | TITE-PIPE-O | 75                     | 25    | -     | -     | -   | 1.9            | 0                       | 0                             |
| 1                          | PIPE        | 73                     | 27    | -     | -     | -   | 1.9            | 0                       | 0                             |
|                            | TITE-PIPE-C | 75                     | 25    | -     | -     | -   | 1.9            | 0                       | 0                             |
|                            | TITE-PIPE-O | 77                     | 23    | -     | -     | -   | 2.0            | 0                       | 0                             |
| 2                          | PIPE        | 73                     | 27    | -     | -     | -   | 1.9            | 0                       | 0                             |
|                            | TITE-PIPE-C | 77                     | 23    | -     | -     | -   | 2.0            | 0                       | 0                             |
|                            | TITE-PIPE-O | 82                     | 18    | -     | -     | -   | 2.1            | 0.1                     | 0                             |
| <i>Scenario C</i>          |             |                        |       |       |       |     |                |                         |                               |
| 0.5                        | PIPE        | 14                     | 24    | 35    | 19    | 2   | 1.3            | 6.2                     | 3.2                           |
|                            | TITE-PIPE-C | 14                     | 24    | 35    | 20    | 1   | 1.3            | 5.5                     | 3.0                           |
|                            | TITE-PIPE-O | 15                     | 24    | 33    | 21    | 1   | 1.3            | 6.5                     | 4.0                           |
| 1                          | PIPE        | 14                     | 24    | 35    | 19    | 2   | 1.3            | 6.2                     | 3.2                           |
|                            | TITE-PIPE-C | 14                     | 24    | 34    | 21    | 1   | 1.3            | 5.4                     | 3.1                           |
|                            | TITE-PIPE-O | 15                     | 22    | 33    | 21    | 2   | 1.3            | 7.2                     | 4.8                           |
| 2                          | PIPE        | 14                     | 24    | 35    | 19    | 2   | 1.3            | 6.2                     | 3.2                           |
|                            | TITE-PIPE-C | 13                     | 23    | 34    | 21    | 2   | 1.3            | 6.9                     | 4.0                           |
|                            | TITE-PIPE-O | 14                     | 22    | 31    | 22    | 3   | 1.2            | 8.2                     | 5.0                           |
| <i>Scenario D</i>          |             |                        |       |       |       |     |                |                         |                               |
| 0.5                        | PIPE        | -                      | -     | -     | 3     | 2   | 0              | 96.0                    | 88.4                          |
|                            | TITE-PIPE-C | -                      | -     | -     | 2     | 1   | 0              | 96.5                    | 88.0                          |
|                            | TITE-PIPE-O | -                      | -     | -     | 3     | 1   | 0              | 96.5                    | 87.9                          |
| 1                          | PIPE        | -                      | -     | -     | 3     | 2   | 0              | 96.0                    | 88.4                          |
|                            | TITE-PIPE-C | -                      | -     | -     | 2     | 1   | 0              | 96.5                    | 87.5                          |
|                            | TITE-PIPE-O | -                      | -     | -     | 2     | 1   | 0              | 97.0                    | 88.3                          |
| 2                          | PIPE        | -                      | -     | -     | 3     | 2   | 0              | 96.0                    | 88.4                          |
|                            | TITE-PIPE-C | -                      | -     | -     | 2     | 1   | 0              | 96.8                    | 88.2                          |
|                            | TITE-PIPE-O | -                      | -     | -     | 2     | 1   | 0              | 97.5                    | 89.2                          |
| <i>Scenario E</i>          |             |                        |       |       |       |     |                |                         |                               |
| 0.5                        | PIPE        | 30                     | 32    | 37    | 0     | -   | 2.1            | 1.0                     | 0.7                           |
|                            | TITE-PIPE-C | 30                     | 32    | 37    | 0     | -   | 2.0            | 1.0                     | 0.8                           |
|                            | TITE-PIPE-O | 31                     | 32    | 35    | 0     | -   | 2.0            | 1.3                     | 1.1                           |
| 1                          | PIPE        | 30                     | 32    | 37    | 0     | -   | 2.1            | 1.0                     | 0.7                           |
|                            | TITE-PIPE-C | 30                     | 32    | 36    | 0     | -   | 2.1            | 1.1                     | 0.9                           |
|                            | TITE-PIPE-O | 31                     | 31    | 36    | 0     | -   | 2.0            | 1.8                     | 1.6                           |
| 2                          | PIPE        | 30                     | 32    | 37    | 0     | -   | 2.1            | 1.0                     | 0.7                           |
|                            | TITE-PIPE-C | 30                     | 32    | 37    | 0     | -   | 2.0            | 1.4                     | 0.9                           |
|                            | TITE-PIPE-O | 32                     | 32    | 33    | 0     | -   | 2.0            | 2.5                     | 2.4                           |
| <i>Scenario F</i>          |             |                        |       |       |       |     |                |                         |                               |
| 0.5                        | PIPE        | 12                     | 72    | -     | 10    | 4   | 1.7            | 1.8                     | 1.3                           |
|                            | TITE-PIPE-C | 12                     | 72    | -     | 10    | 3   | 1.7            | 2.1                     | 1.4                           |
|                            | TITE-PIPE-O | 13                     | 71    | -     | 11    | 3   | 1.7            | 2.8                     | 1.9                           |
| 1                          | PIPE        | 12                     | 72    | -     | 10    | 4   | 1.7            | 1.8                     | 1.3                           |
|                            | TITE-PIPE-C | 13                     | 72    | -     | 10    | 3   | 1.7            | 2.6                     | 1.9                           |
|                            | TITE-PIPE-O | 12                     | 71    | -     | 11    | 4   | 1.7            | 2.8                     | 1.9                           |
| 2                          | PIPE        | 12                     | 72    | -     | 10    | 4   | 1.7            | 1.8                     | 1.4                           |
|                            | TITE-PIPE-C | 12                     | 71    | -     | 10    | 4   | 1.7            | 3.8                     | 2.2                           |
|                            | TITE-PIPE-O | 12                     | 70    | -     | 10    | 4   | 1.6            | 4.0                     | 2.5                           |
| <i>Scenario G</i>          |             |                        |       |       |       |     |                |                         |                               |
| 0.5                        | PIPE        | 45                     | 38    | 16    | 1     | 0   | 2.8            | 0                       | 0                             |
|                            | TITE-PIPE-C | 45                     | 37    | 17    | 1     | 1   | 2.7            | 0                       | 0                             |
|                            | TITE-PIPE-O | 44                     | 36    | 18    | 1     | 1   | 2.7            | 0                       | 0                             |
| 1                          | PIPE        | 45                     | 38    | 16    | 1     | 0   | 2.8            | 0                       | 0                             |
|                            | TITE-PIPE-C | 44                     | 38    | 17    | 1     | 1   | 2.7            | 0                       | 0                             |
|                            | TITE-PIPE-O | 45                     | 36    | 17    | 1     | 1   | 2.7            | 0                       | 0                             |
| 2                          | PIPE        | 45                     | 38    | 16    | 1     | 0   | 2.8            | 0                       | 0                             |
|                            | TITE-PIPE-C | 44                     | 36    | 18    | 1     | 0   | 2.7            | 0                       | 0                             |
|                            | TITE-PIPE-O | 45                     | 36    | 17    | 1     | 1   | 2.7            | 0.1                     | 0.2                           |

**Table S7.** Mean trial durations (in time units) per design and scenario, with percentage change from PIPE (in parentheses) using uniform and adaptive weight functions (assuming Pareto distributed DLT model).

| Arrival rate ( $\lambda$ ) | Design      | Scenario   |            |            |            |            |            |            |
|----------------------------|-------------|------------|------------|------------|------------|------------|------------|------------|
|                            |             | A          | B          | C          | D          | E          | F          | G          |
| <b>Uniform</b>             |             |            |            |            |            |            |            |            |
| 0.5                        | PIPE        | 79.3 (-)   | 79.5 (-)   | 78.3 (-)   | 39.1 (-)   | 79.1 (-)   | 78.6 (-)   | 79.5 (-)   |
|                            | TITE-PIPE-C | 79 (0)     | 79.1 (-1)  | 77.9 (0)   | 39.3 (0)   | 78.7 (0)   | 78.3 (0)   | 79.1 (0)   |
|                            | TITE-PIPE-O | 79.0 (0)   | 79.1 (-1)  | 77.5 (-1)  | 38.9 (0)   | 78.6 (-1)  | 78.0 (-1)  | 79.1 (0)   |
| 1                          | PIPE        | 41.7 (-)   | 42.2 (-)   | 41.0 (-)   | 20.1 (-)   | 41.6 (-)   | 41.4 (-)   | 41.9 (0)   |
|                            | TITE-PIPE-C | 40.0 (-4)  | 40.1 (-5)  | 39.4 (-4)  | 19.8 (-2)  | 39.8 (-4)  | 39.6 (-4)  | 40.0 (-5)  |
|                            | TITE-PIPE-O | 39.9 (-4)  | 40.0 (-5)  | 39.2 (-5)  | 19.4 (-3)  | 39.7 (-4)  | 39.6 (-4)  | 40.0 (-5)  |
| 2                          | PIPE        | 29.7 (-)   | 30.7 (-)   | 28.9 (-)   | 13.4 (-)   | 29.6 (-)   | 29.5 (-)   | 30.0 (-)   |
|                            | TITE-PIPE-C | 20.5 (-31) | 20.6 (-33) | 20.2 (-30) | 10.3 (-23) | 20.5 (-31) | 20.3 (-31) | 20.5 (-31) |
|                            | TITE-PIPE-O | 20.4 (-31) | 20.5 (-33) | 20.1 (-30) | 9.9 (-26)  | 20.3 (-31) | 20.2 (-31) | 20.5 (-32) |
| <b>Adaptive</b>            |             |            |            |            |            |            |            |            |
| 0.5                        | PIPE        | 79.3 (-)   | 79.5 (-)   | 78.3 (-)   | 39.1 (-)   | 79.1 (-)   | 78.6 (-)   | 79.5 (-)   |
|                            | TITE-PIPE-C | 79.0 (0)   | 79.1 (-1)  | 77.9 (0)   | 39.1 (0)   | 78.7 (0)   | 78.2 (-1)  | 79.1 (0)   |
|                            | TITE-PIPE-O | 78.9 (-1)  | 79.1 (-1)  | 77.4 (-1)  | 38.9 (0)   | 78.6 (-1)  | 78.0 (-1)  | 79.1 (0)   |
| 1                          | PIPE        | 41.7 (-)   | 42.2 (-)   | 41.0 (-)   | 20.1 (-)   | 41.6 (-)   | 41.4 (-)   | 41.9 (0)   |
|                            | TITE-PIPE-C | 40.0 (-4)  | 40.0 (-5)  | 39.4 (-4)  | 19.7 (-2)  | 39.8 (-4)  | 39.5 (-5)  | 40.0 (-5)  |
|                            | TITE-PIPE-O | 39.9 (-4)  | 40.0 (-5)  | 38.9 (-5)  | 19.4 (-4)  | 39.7 (-5)  | 39.5 (-5)  | 40.0 (-5)  |
| 2                          | PIPE        | 29.7 (-)   | 30.7 (-)   | 28.9 (-)   | 13.4 (-)   | 29.6 (-)   | 29.5 (-)   | 30.0 (-)   |
|                            | TITE-PIPE-C | 20.5 (-31) | 20.6 (-33) | 20.2 (-30) | 10.2 (-24) | 20.5 (-31) | 20.3 (-31) | 20.5 (-31) |
|                            | TITE-PIPE-O | 20.4 (-31) | 20.5 (-33) | 19.9 (-31) | 9.8 (-27)  | 20.2 (-32) | 20.2 (-32) | 20.5 (-32) |

**Table S8.** Experimentation percentages using uniform weight function (assuming Weibull distributed DLT model).

| Arrival rate ( $\lambda$ ) | Design      | Probability of DLT (%) |       |       |       |     | Mean Sample Size | Mean DLTs (%) |
|----------------------------|-------------|------------------------|-------|-------|-------|-----|------------------|---------------|
|                            |             | 0-14                   | 15-24 | 25-34 | 35-45 | 46+ |                  |               |
| <i>Scenario A</i>          |             |                        |       |       |       |     |                  |               |
| 0.5                        | PIPE        | 20                     | 63    | 17    | -     | -   | 40.0             | 20            |
|                            | TITE-PIPE-C | 21                     | 62    | 16    | -     | -   | 39.9             | 19            |
|                            | TITE-PIPE-O | 23                     | 62    | 15    | -     | -   | 39.9             | 19            |
| 1                          | PIPE        | 20                     | 63    | 17    | -     | -   | 40.0             | 20            |
|                            | TITE-PIPE-C | 23                     | 62    | 15    | -     | -   | 39.9             | 19            |
|                            | TITE-PIPE-O | 26                     | 61    | 13    | -     | -   | 39.9             | 18            |
| 2                          | PIPE        | 20                     | 63    | 17    | -     | -   | 40.0             | 20            |
|                            | TITE-PIPE-C | 27                     | 60    | 13    | -     | -   | 39.9             | 18            |
|                            | TITE-PIPE-O | 34                     | 58    | 8     | -     | -   | 39.9             | 17            |
| <i>Scenario B</i>          |             |                        |       |       |       |     |                  |               |
| 0.5                        | PIPE        | 76                     | 24    | -     | -     | -   | 40.0             | 12            |
|                            | TITE-PIPE-C | 77                     | 23    | -     | -     | -   | 40.0             | 11            |
|                            | TITE-PIPE-O | 79                     | 21    | -     | -     | -   | 40.0             | 11            |
| 1                          | PIPE        | 76                     | 24    | -     | -     | -   | 40.0             | 12            |
|                            | TITE-PIPE-C | 78                     | 22    | -     | -     | -   | 40.0             | 11            |
|                            | TITE-PIPE-O | 83                     | 17    | -     | -     | -   | 40.0             | 11            |
| 2                          | PIPE        | 76                     | 24    | -     | -     | -   | 40.0             | 12            |
|                            | TITE-PIPE-C | 83                     | 17    | -     | -     | -   | 40.0             | 11            |
|                            | TITE-PIPE-O | 90                     | 10    | -     | -     | -   | 40.0             | 10            |
| <i>Scenario C</i>          |             |                        |       |       |       |     |                  |               |
| 0.5                        | PIPE        | 14                     | 15    | 28    | 33    | 11  | 39.4             | 32            |
|                            | TITE-PIPE-C | 14                     | 16    | 27    | 32    | 10  | 39.4             | 31            |
|                            | TITE-PIPE-O | 14                     | 16    | 28    | 33    | 10  | 38.9             | 31            |
| 1                          | PIPE        | 14                     | 15    | 28    | 33    | 11  | 39.4             | 32            |
|                            | TITE-PIPE-C | 15                     | 16    | 28    | 32    | 10  | 39.4             | 31            |
|                            | TITE-PIPE-O | 15                     | 16    | 28    | 31    | 9   | 38.8             | 31            |
| 2                          | PIPE        | 14                     | 15    | 28    | 33    | 11  | 39.4             | 32            |
|                            | TITE-PIPE-C | 18                     | 16    | 27    | 29    | 10  | 39.3             | 30            |
|                            | TITE-PIPE-O | 18                     | 17    | 29    | 29    | 7   | 38.8             | 29            |
| <i>Scenario D</i>          |             |                        |       |       |       |     |                  |               |
| 0.5                        | PIPE        | -                      | -     | -     | 58    | 42  | 19.5             | 61            |
|                            | TITE-PIPE-C | -                      | -     | -     | 61    | 39  | 19.9             | 60            |
|                            | TITE-PIPE-O | -                      | -     | -     | 61    | 39  | 19.6             | 60            |
| 1                          | PIPE        | -                      | -     | -     | 58    | 42  | 19.5             | 61            |
|                            | TITE-PIPE-C | -                      | -     | -     | 63    | 37  | 20.0             | 60            |
|                            | TITE-PIPE-O | -                      | -     | -     | 65    | 35  | 19.6             | 60            |
| 2                          | PIPE        | -                      | -     | -     | 58    | 42  | 19.5             | 61            |
|                            | TITE-PIPE-C | -                      | -     | -     | 67    | 33  | 19.9             | 60            |
|                            | TITE-PIPE-O | -                      | -     | -     | 69    | 31  | 19.5             | 60            |
| <i>Scenario E</i>          |             |                        |       |       |       |     |                  |               |
| 0.5                        | PIPE        | 30                     | 31    | 38    | 1     | -   | 39.8             | 21            |
|                            | TITE-PIPE-C | 30                     | 31    | 38    | 0     | -   | 39.8             | 21            |
|                            | TITE-PIPE-O | 32                     | 31    | 37    | 0     | -   | 39.7             | 21            |
| 1                          | PIPE        | 30                     | 31    | 38    | 1     | -   | 39.8             | 21            |
|                            | TITE-PIPE-C | 31                     | 31    | 38    | 0     | -   | 39.8             | 21            |
|                            | TITE-PIPE-O | 34                     | 31    | 35    | 0     | -   | 39.7             | 20            |
| 2                          | PIPE        | 30                     | 31    | 38    | 1     | -   | 39.8             | 21            |
|                            | TITE-PIPE-C | 33                     | 31    | 37    | 0     | -   | 39.8             | 20            |
|                            | TITE-PIPE-O | 37                     | 32    | 31    | 0     | -   | 39.5             | 20            |
| <i>Scenario F</i>          |             |                        |       |       |       |     |                  |               |
| 0.5                        | PIPE        | 21                     | 55    | -     | 14    | 11  | 39.6             | 25            |
|                            | TITE-PIPE-C | 22                     | 54    | -     | 14    | 11  | 39.6             | 25            |
|                            | TITE-PIPE-O | 22                     | 53    | -     | 14    | 10  | 39.4             | 25            |
| 1                          | PIPE        | 21                     | 55    | -     | 14    | 11  | 39.6             | 25            |
|                            | TITE-PIPE-C | 23                     | 52    | -     | 14    | 10  | 39.5             | 25            |
|                            | TITE-PIPE-O | 25                     | 52    | -     | 14    | 9   | 39.4             | 24            |
| 2                          | PIPE        | 21                     | 55    | -     | 14    | 11  | 39.6             | 25            |
|                            | TITE-PIPE-C | 28                     | 48    | -     | 14    | 10  | 39.5             | 24            |
|                            | TITE-PIPE-O | 31                     | 49    | -     | 14    | 7   | 39.2             | 23            |
| <i>Scenario G</i>          |             |                        |       |       |       |     |                  |               |
| 0.5                        | PIPE        | 38                     | 35    | 20    | 3     | 3   | 40.0             | 17            |
|                            | TITE-PIPE-C | 40                     | 35    | 20    | 3     | 3   | 40.0             | 17            |
|                            | TITE-PIPE-O | 41                     | 34    | 19    | 3     | 2   | 40.0             | 17            |
| 1                          | PIPE        | 38                     | 35    | 20    | 3     | 3   | 40.0             | 17            |
|                            | TITE-PIPE-C | 41                     | 35    | 19    | 3     | 2   | 40.0             | 17            |
|                            | TITE-PIPE-O | 45                     | 33    | 18    | 3     | 2   | 40.0             | 16            |
| 2                          | PIPE        | 38                     | 35    | 20    | 3     | 3   | 40.0             | 17            |
|                            | TITE-PIPE-C | 45                     | 33    | 17    | 2     | 2   | 40.0             | 16            |
|                            | TITE-PIPE-O | 52                     | 30    | 15    | 2     | 2   | 40.0             | 14            |

**Table S9.** Recommendation percentages using uniform weight function (assuming Weibull distributed DLT model).

| Arrival rate ( $\lambda$ ) | Design      | Probability of DLT (%) |       |       |       |     | Mean No. MTDCs | Trials with no MTDC (%) | Trials that stopped early (%) |
|----------------------------|-------------|------------------------|-------|-------|-------|-----|----------------|-------------------------|-------------------------------|
|                            |             | 0-14                   | 15-24 | 25-34 | 35-45 | 46+ |                |                         |                               |
| <i>Scenario A</i>          |             |                        |       |       |       |     |                |                         |                               |
| 0.5                        | PIPE        | 11                     | 75    | 14    | -     | -   | 2.2            | 0.2                     | 0.2                           |
|                            | TITE-PIPE-C | 11                     | 75    | 14    | -     | -   | 2.2            | 0.2                     | 0.2                           |
|                            | TITE-PIPE-O | 11                     | 75    | 13    | -     | -   | 2.2            | 0.4                     | 0.2                           |
| 1                          | PIPE        | 11                     | 75    | 14    | -     | -   | 2.2            | 0.2                     | 0.2                           |
|                            | TITE-PIPE-C | 11                     | 75    | 14    | -     | -   | 2.2            | 0.4                     | 0.2                           |
|                            | TITE-PIPE-O | 11                     | 74    | 15    | -     | -   | 2.2            | 0.5                     | 0.5                           |
| 2                          | PIPE        | 11                     | 75    | 14    | -     | -   | 2.2            | 0.2                     | 0.2                           |
|                            | TITE-PIPE-C | 11                     | 75    | 14    | -     | -   | 2.2            | 0.5                     | 0.4                           |
|                            | TITE-PIPE-O | 12                     | 75    | 12    | -     | -   | 2.2            | 0.9                     | 0.6                           |
| <i>Scenario B</i>          |             |                        |       |       |       |     |                |                         |                               |
| 0.5                        | PIPE        | 73                     | 27    | -     | -     | -   | 1.9            | 0                       | 0                             |
|                            | TITE-PIPE-C | 73                     | 27    | -     | -     | -   | 1.9            | 0                       | 0                             |
|                            | TITE-PIPE-O | 74                     | 26    | -     | -     | -   | 1.9            | 0                       | 0                             |
| 1                          | PIPE        | 73                     | 27    | -     | -     | -   | 1.9            | 0                       | 0                             |
|                            | TITE-PIPE-C | 74                     | 26    | -     | -     | -   | 1.9            | 0                       | 0                             |
|                            | TITE-PIPE-O | 76                     | 24    | -     | -     | -   | 2.0            | 0                       | 0                             |
| 2                          | PIPE        | 73                     | 27    | -     | -     | -   | 1.9            | 0                       | 0                             |
|                            | TITE-PIPE-C | 77                     | 23    | -     | -     | -   | 2.0            | 0                       | 0                             |
|                            | TITE-PIPE-O | 81                     | 19    | -     | -     | -   | 2.1            | 0                       | 0                             |
| <i>Scenario C</i>          |             |                        |       |       |       |     |                |                         |                               |
| 0.5                        | PIPE        | 14                     | 24    | 35    | 19    | 2   | 1.3            | 6.2                     | 3.2                           |
|                            | TITE-PIPE-C | 14                     | 23    | 34    | 21    | 1   | 1.3            | 5.4                     | 2.8                           |
|                            | TITE-PIPE-O | 13                     | 23    | 34    | 22    | 1   | 1.3            | 7.5                     | 5.0                           |
| 1                          | PIPE        | 14                     | 24    | 35    | 19    | 2   | 1.3            | 6.2                     | 3.2                           |
|                            | TITE-PIPE-C | 14                     | 23    | 35    | 21    | 2   | 1.3            | 5.4                     | 2.8                           |
|                            | TITE-PIPE-O | 14                     | 22    | 34    | 20    | 2   | 1.2            | 8.1                     | 5.3                           |
| 2                          | PIPE        | 14                     | 24    | 35    | 19    | 2   | 1.3            | 6.2                     | 3.2                           |
|                            | TITE-PIPE-C | 13                     | 21    | 35    | 22    | 2   | 1.3            | 6.9                     | 3.8                           |
|                            | TITE-PIPE-O | 13                     | 22    | 32    | 22    | 2   | 1.2            | 9.0                     | 5.9                           |
| <i>Scenario D</i>          |             |                        |       |       |       |     |                |                         |                               |
| 0.5                        | PIPE        | -                      | -     | -     | 3     | 2   | 0              | 96.0                    | 88.4                          |
|                            | TITE-PIPE-C | -                      | -     | -     | 2     | 1   | 0              | 96.3                    | 87.0                          |
|                            | TITE-PIPE-O | -                      | -     | -     | 2     | 1   | 0              | 96.4                    | 87.2                          |
| 1                          | PIPE        | -                      | -     | -     | 3     | 2   | 0              | 96.0                    | 88.4                          |
|                            | TITE-PIPE-C | -                      | -     | -     | 2     | 2   | 0              | 96.2                    | 86.3                          |
|                            | TITE-PIPE-O | -                      | -     | -     | 2     | 1   | 0              | 97.0                    | 87.7                          |
| 2                          | PIPE        | -                      | -     | -     | 3     | 2   | 0              | 96.0                    | 88.4                          |
|                            | TITE-PIPE-C | -                      | -     | -     | 2     | 1   | 0              | 96.9                    | 87.6                          |
|                            | TITE-PIPE-O | -                      | -     | -     | 2     | 1   | 0              | 97.2                    | 88.3                          |
| <i>Scenario E</i>          |             |                        |       |       |       |     |                |                         |                               |
| 0.5                        | PIPE        | 30                     | 32    | 37    | 0     | -   | 2.1            | 1.0                     | 0.7                           |
|                            | TITE-PIPE-C | 29                     | 32    | 38    | 0     | -   | 2.1            | 1.1                     | 1.0                           |
|                            | TITE-PIPE-O | 30                     | 32    | 36    | 0     | -   | 2.0            | 1.4                     | 1.1                           |
| 1                          | PIPE        | 30                     | 32    | 37    | 0     | -   | 2.1            | 1.0                     | 0.7                           |
|                            | TITE-PIPE-C | 30                     | 32    | 37    | 0     | -   | 2.0            | 1.1                     | 0.9                           |
|                            | TITE-PIPE-O | 31                     | 32    | 36    | 0     | -   | 2.0            | 1.5                     | 1.2                           |
| 2                          | PIPE        | 30                     | 32    | 37    | 0     | -   | 2.1            | 1.0                     | 0.7                           |
|                            | TITE-PIPE-C | 30                     | 32    | 37    | 0     | -   | 2.0            | 1.2                     | 0.9                           |
|                            | TITE-PIPE-O | 31                     | 32    | 34    | 0     | -   | 1.9            | 2.4                     | 2.1                           |
| <i>Scenario F</i>          |             |                        |       |       |       |     |                |                         |                               |
| 0.5                        | PIPE        | 12                     | 72    | -     | 10    | 4   | 1.7            | 1.8                     | 1.3                           |
|                            | TITE-PIPE-C | 12                     | 72    | -     | 10    | 4   | 1.7            | 2.1                     | 1.4                           |
|                            | TITE-PIPE-O | 12                     | 71    | -     | 10    | 4   | 1.7            | 3.1                     | 2.2                           |
| 1                          | PIPE        | 12                     | 72    | -     | 10    | 4   | 1.7            | 1.8                     | 1.3                           |
|                            | TITE-PIPE-C | 12                     | 72    | -     | 10    | 3   | 1.7            | 2.5                     | 1.8                           |
|                            | TITE-PIPE-O | 12                     | 70    | -     | 10    | 5   | 1.7            | 2.9                     | 2.2                           |
| 2                          | PIPE        | 12                     | 72    | -     | 10    | 4   | 1.7            | 1.8                     | 1.4                           |
|                            | TITE-PIPE-C | 12                     | 72    | -     | 9     | 4   | 1.7            | 3.4                     | 1.9                           |
|                            | TITE-PIPE-O | 12                     | 69    | -     | 10    | 4   | 1.6            | 5.1                     | 3.2                           |
| <i>Scenario G</i>          |             |                        |       |       |       |     |                |                         |                               |
| 0.5                        | PIPE        | 45                     | 38    | 16    | 1     | 0   | 2.8            | 0                       | 0                             |
|                            | TITE-PIPE-C | 44                     | 38    | 17    | 1     | 1   | 2.7            | 0                       | 0                             |
|                            | TITE-PIPE-O | 44                     | 37    | 17    | 1     | 1   | 2.7            | 0                       | 0                             |
| 1                          | PIPE        | 45                     | 38    | 16    | 1     | 0   | 2.8            | 0                       | 0                             |
|                            | TITE-PIPE-C | 44                     | 38    | 17    | 1     | 0   | 2.7            | 0                       | 0                             |
|                            | TITE-PIPE-O | 44                     | 37    | 18    | 1     | 1   | 2.7            | 0                       | 0                             |
| 2                          | PIPE        | 45                     | 38    | 16    | 1     | 0   | 2.8            | 0                       | 0                             |
|                            | TITE-PIPE-C | 44                     | 36    | 18    | 1     | 0   | 2.7            | 0                       | 0                             |
|                            | TITE-PIPE-O | 45                     | 36    | 17    | 1     | 1   | 2.7            | 0                       | 0                             |

**Table S10.** Experimentation percentages using adaptive weight function (assuming Weibull distributed DLT model).

| Arrival rate ( $\lambda$ ) | Design      | Probability of DLT (%) |       |       |       |     | Mean Sample Size | Mean DLTs (%) |
|----------------------------|-------------|------------------------|-------|-------|-------|-----|------------------|---------------|
|                            |             | 0-14                   | 15-24 | 25-34 | 35-45 | 46+ |                  |               |
| <i>Scenario A</i>          |             |                        |       |       |       |     |                  |               |
| 0.5                        | PIPE        | 20                     | 63    | 17    | -     | -   | 40.0             | 20            |
|                            | TITE-PIPE-C | 22                     | 62    | 16    | -     | -   | 39.9             | 19            |
|                            | TITE-PIPE-O | 25                     | 61    | 14    | -     | -   | 39.9             | 19            |
| 1                          | PIPE        | 20                     | 63    | 17    | -     | -   | 40.0             | 20            |
|                            | TITE-PIPE-C | 24                     | 61    | 15    | -     | -   | 39.9             | 19            |
|                            | TITE-PIPE-O | 29                     | 60    | 11    | -     | -   | 39.9             | 18            |
| 2                          | PIPE        | 20                     | 63    | 17    | -     | -   | 40.0             | 20            |
|                            | TITE-PIPE-C | 29                     | 59    | 12    | -     | -   | 39.9             | 18            |
|                            | TITE-PIPE-O | 39                     | 55    | 6     | -     | -   | 39.9             | 16            |
| <i>Scenario B</i>          |             |                        |       |       |       |     |                  |               |
| 0.5                        | PIPE        | 76                     | 24    | -     | -     | -   | 40.0             | 12            |
|                            | TITE-PIPE-C | 78                     | 22    | -     | -     | -   | 40.0             | 11            |
|                            | TITE-PIPE-O | 80                     | 20    | -     | -     | -   | 40.0             | 11            |
| 1                          | PIPE        | 76                     | 24    | -     | -     | -   | 40.0             | 12            |
|                            | TITE-PIPE-C | 80                     | 20    | -     | -     | -   | 40.0             | 11            |
|                            | TITE-PIPE-O | 86                     | 14    | -     | -     | -   | 40.0             | 11            |
| 2                          | PIPE        | 76                     | 24    | -     | -     | -   | 40.0             | 12            |
|                            | TITE-PIPE-C | 85                     | 15    | -     | -     | -   | 40.0             | 11            |
|                            | TITE-PIPE-O | 93                     | 7     | -     | -     | -   | 40.0             | 10            |
| <i>Scenario C</i>          |             |                        |       |       |       |     |                  |               |
| 0.5                        | PIPE        | 14                     | 15    | 28    | 33    | 11  | 39.4             | 32            |
|                            | TITE-PIPE-C | 15                     | 16    | 28    | 32    | 10  | 39.3             | 31            |
|                            | TITE-PIPE-O | 15                     | 16    | 28    | 31    | 9   | 39.0             | 31            |
| 1                          | PIPE        | 14                     | 15    | 28    | 33    | 11  | 39.4             | 32            |
|                            | TITE-PIPE-C | 17                     | 16    | 27    | 30    | 10  | 39.3             | 30            |
|                            | TITE-PIPE-O | 17                     | 17    | 28    | 29    | 8   | 39.0             | 29            |
| 2                          | PIPE        | 14                     | 15    | 28    | 33    | 11  | 39.4             | 32            |
|                            | TITE-PIPE-C | 21                     | 16    | 26    | 28    | 9   | 39.3             | 29            |
|                            | TITE-PIPE-O | 22                     | 19    | 28    | 26    | 5   | 39.0             | 27            |
| <i>Scenario D</i>          |             |                        |       |       |       |     |                  |               |
| 0.5                        | PIPE        | -                      | -     | -     | 58    | 42  | 19.5             | 61            |
|                            | TITE-PIPE-C | -                      | -     | -     | 62    | 38  | 19.5             | 60            |
|                            | TITE-PIPE-O | -                      | -     | -     | 62    | 38  | 19.3             | 60            |
| 1                          | PIPE        | -                      | -     | -     | 58    | 42  | 19.5             | 61            |
|                            | TITE-PIPE-C | -                      | -     | -     | 64    | 36  | 19.4             | 60            |
|                            | TITE-PIPE-O | -                      | -     | -     | 66    | 34  | 19.0             | 60            |
| 2                          | PIPE        | -                      | -     | -     | 58    | 42  | 19.5             | 61            |
|                            | TITE-PIPE-C | -                      | -     | -     | 68    | 32  | 19.4             | 60            |
|                            | TITE-PIPE-O | -                      | -     | -     | 71    | 29  | 18.9             | 60            |
| <i>Scenario E</i>          |             |                        |       |       |       |     |                  |               |
| 0.5                        | PIPE        | 30                     | 31    | 38    | 1     | -   | 39.8             | 21            |
|                            | TITE-PIPE-C | 31                     | 31    | 38    | 0     | -   | 39.8             | 21            |
|                            | TITE-PIPE-O | 33                     | 31    | 36    | 0     | -   | 39.7             | 21            |
| 1                          | PIPE        | 30                     | 31    | 38    | 1     | -   | 39.8             | 21            |
|                            | TITE-PIPE-C | 32                     | 31    | 37    | 0     | -   | 39.8             | 21            |
|                            | TITE-PIPE-O | 35                     | 31    | 34    | 0     | -   | 39.6             | 20            |
| 2                          | PIPE        | 30                     | 31    | 38    | 1     | -   | 39.8             | 21            |
|                            | TITE-PIPE-C | 34                     | 30    | 36    | 0     | -   | 39.8             | 20            |
|                            | TITE-PIPE-O | 39                     | 32    | 28    | 0     | -   | 39.6             | 19            |
| <i>Scenario F</i>          |             |                        |       |       |       |     |                  |               |
| 0.5                        | PIPE        | 21                     | 55    | -     | 14    | 11  | 39.6             | 25            |
|                            | TITE-PIPE-C | 23                     | 53    | -     | 14    | 11  | 39.5             | 25            |
|                            | TITE-PIPE-O | 24                     | 52    | -     | 14    | 10  | 39.4             | 24            |
| 1                          | PIPE        | 21                     | 55    | -     | 14    | 11  | 39.6             | 25            |
|                            | TITE-PIPE-C | 25                     | 50    | -     | 14    | 10  | 39.5             | 25            |
|                            | TITE-PIPE-O | 28                     | 50    | -     | 14    | 8   | 39.4             | 24            |
| 2                          | PIPE        | 21                     | 55    | -     | 14    | 11  | 39.6             | 25            |
|                            | TITE-PIPE-C | 30                     | 46    | -     | 14    | 10  | 39.5             | 24            |
|                            | TITE-PIPE-O | 35                     | 46    | -     | 14    | 5   | 39.3             | 22            |
| <i>Scenario G</i>          |             |                        |       |       |       |     |                  |               |
| 0.5                        | PIPE        | 38                     | 35    | 20    | 3     | 3   | 40.0             | 17            |
|                            | TITE-PIPE-C | 41                     | 35    | 19    | 3     | 2   | 40.0             | 17            |
|                            | TITE-PIPE-O | 43                     | 34    | 18    | 3     | 2   | 40.0             | 16            |
| 1                          | PIPE        | 38                     | 35    | 20    | 3     | 3   | 40.0             | 17            |
|                            | TITE-PIPE-C | 43                     | 34    | 18    | 3     | 2   | 40.0             | 16            |
|                            | TITE-PIPE-O | 48                     | 32    | 17    | 2     | 2   | 40.0             | 15            |
| 2                          | PIPE        | 38                     | 35    | 20    | 3     | 3   | 40.0             | 17            |
|                            | TITE-PIPE-C | 48                     | 32    | 16    | 2     | 2   | 40.0             | 15            |
|                            | TITE-PIPE-O | 56                     | 28    | 13    | 1     | 1   | 40.0             | 13            |

**Table S11.** Recommendation percentages using adaptive weight function (assuming Weibull distributed DLT model).

| Arrival rate ( $\lambda$ ) | Design      | Probability of DLT (%) |       |       |       |     | Mean No. MTDCs | Trials with no MTDC (%) | Trials that stopped early (%) |
|----------------------------|-------------|------------------------|-------|-------|-------|-----|----------------|-------------------------|-------------------------------|
|                            |             | 0-14                   | 15-24 | 25-34 | 35-45 | 46+ |                |                         |                               |
| <i>Scenario A</i>          |             |                        |       |       |       |     |                |                         |                               |
| 0.5                        | PIPE        | 11                     | 75    | 14    | -     | -   | 2.2            | 0.2                     | 0.2                           |
|                            | TITE-PIPE-C | 10                     | 74    | 15    | -     | -   | 2.2            | 0.4                     | 0.3                           |
|                            | TITE-PIPE-O | 11                     | 74    | 14    | -     | -   | 2.2            | 0.5                     | 0.4                           |
| 1                          | PIPE        | 11                     | 75    | 14    | -     | -   | 2.2            | 0.2                     | 0.2                           |
|                            | TITE-PIPE-C | 11                     | 75    | 14    | -     | -   | 2.2            | 0.4                     | 0.3                           |
|                            | TITE-PIPE-O | 12                     | 75    | 13    | -     | -   | 2.2            | 0.4                     | 0.4                           |
| 2                          | PIPE        | 11                     | 75    | 14    | -     | -   | 2.2            | 0.2                     | 0.2                           |
|                            | TITE-PIPE-C | 12                     | 74    | 14    | -     | -   | 2.2            | 0.6                     | 0.4                           |
|                            | TITE-PIPE-O | 14                     | 75    | 10    | -     | -   | 2.2            | 0.8                     | 0.5                           |
| <i>Scenario B</i>          |             |                        |       |       |       |     |                |                         |                               |
| 0.5                        | PIPE        | 73                     | 27    | -     | -     | -   | 1.9            | 0                       | 0                             |
|                            | TITE-PIPE-C | 73                     | 27    | -     | -     | -   | 1.9            | 0                       | 0                             |
|                            | TITE-PIPE-O | 75                     | 25    | -     | -     | -   | 1.9            | 0                       | 0                             |
| 1                          | PIPE        | 73                     | 27    | -     | -     | -   | 1.9            | 0                       | 0                             |
|                            | TITE-PIPE-C | 75                     | 25    | -     | -     | -   | 2.0            | 0                       | 0                             |
|                            | TITE-PIPE-O | 78                     | 22    | -     | -     | -   | 2.0            | 0.1                     | 0.1                           |
| 2                          | PIPE        | 73                     | 27    | -     | -     | -   | 1.9            | 0                       | 0                             |
|                            | TITE-PIPE-C | 78                     | 22    | -     | -     | -   | 2.0            | 0                       | 0                             |
|                            | TITE-PIPE-O | 85                     | 15    | -     | -     | -   | 2.2            | 0.2                     | 0                             |
| <i>Scenario C</i>          |             |                        |       |       |       |     |                |                         |                               |
| 0.5                        | PIPE        | 14                     | 24    | 35    | 19    | 2   | 1.3            | 6.2                     | 3.2                           |
|                            | TITE-PIPE-C | 14                     | 23    | 34    | 22    | 1   | 1.3            | 5.3                     | 3.3                           |
|                            | TITE-PIPE-O | 14                     | 23    | 35    | 20    | 1   | 1.3            | 7.0                     | 4.5                           |
| 1                          | PIPE        | 14                     | 24    | 35    | 19    | 2   | 1.3            | 6.2                     | 3.2                           |
|                            | TITE-PIPE-C | 14                     | 23    | 34    | 21    | 2   | 1.3            | 5.8                     | 3.5                           |
|                            | TITE-PIPE-O | 15                     | 21    | 33    | 22    | 1   | 1.2            | 7.6                     | 4.9                           |
| 2                          | PIPE        | 14                     | 24    | 35    | 19    | 2   | 1.3            | 6.2                     | 3.2                           |
|                            | TITE-PIPE-C | 13                     | 20    | 33    | 23    | 2   | 1.3            | 7.8                     | 4.2                           |
|                            | TITE-PIPE-O | 14                     | 22    | 32    | 22    | 2   | 1.2            | 9.2                     | 5.0                           |
| <i>Scenario D</i>          |             |                        |       |       |       |     |                |                         |                               |
| 0.5                        | PIPE        | -                      | -     | -     | 3     | 2   | 0              | 96.0                    | 88.4                          |
|                            | TITE-PIPE-C | -                      | -     | -     | 2     | 1   | 0              | 96.6                    | 88.2                          |
|                            | TITE-PIPE-O | -                      | -     | -     | 2     | 1   | 0              | 96.5                    | 88.3                          |
| 1                          | PIPE        | -                      | -     | -     | 3     | 2   | 0              | 96.0                    | 88.4                          |
|                            | TITE-PIPE-C | -                      | -     | -     | 2     | 1   | 0              | 97.0                    | 88.1                          |
|                            | TITE-PIPE-O | -                      | -     | -     | 1     | 1   | 0              | 97.9                    | 89.5                          |
| 2                          | PIPE        | -                      | -     | -     | 3     | 2   | 0              | 96.0                    | 88.4                          |
|                            | TITE-PIPE-C | -                      | -     | -     | 1     | 1   | 0              | 97.4                    | 88.5                          |
|                            | TITE-PIPE-O | -                      | -     | -     | 1     | 1   | 0              | 98.2                    | 89.4                          |
| <i>Scenario E</i>          |             |                        |       |       |       |     |                |                         |                               |
| 0.5                        | PIPE        | 30                     | 32    | 37    | 0     | -   | 2.1            | 1.0                     | 0.7                           |
|                            | TITE-PIPE-C | 30                     | 32    | 37    | 0     | -   | 2.0            | 1.1                     | 0.8                           |
|                            | TITE-PIPE-O | 30                     | 32    | 36    | 0     | -   | 2.0            | 1.5                     | 1.4                           |
| 1                          | PIPE        | 30                     | 32    | 37    | 0     | -   | 2.1            | 1.0                     | 0.7                           |
|                            | TITE-PIPE-C | 31                     | 32    | 36    | 0     | -   | 2.0            | 1.0                     | 0.8                           |
|                            | TITE-PIPE-O | 31                     | 31    | 35    | 0     | -   | 2.0            | 2.1                     | 1.7                           |
| 2                          | PIPE        | 30                     | 32    | 37    | 0     | -   | 2.1            | 1.0                     | 0.7                           |
|                            | TITE-PIPE-C | 30                     | 32    | 36    | 0     | -   | 2.0            | 1.5                     | 1.1                           |
|                            | TITE-PIPE-O | 33                     | 32    | 32    | 0     | -   | 1.9            | 2.5                     | 1.6                           |
| <i>Scenario F</i>          |             |                        |       |       |       |     |                |                         |                               |
| 0.5                        | PIPE        | 12                     | 72    | -     | 10    | 4   | 1.7            | 1.8                     | 1.3                           |
|                            | TITE-PIPE-C | 12                     | 72    | -     | 10    | 3   | 1.7            | 2.4                     | 1.6                           |
|                            | TITE-PIPE-O | 12                     | 70    | -     | 11    | 4   | 1.7            | 2.8                     | 1.8                           |
| 1                          | PIPE        | 12                     | 72    | -     | 10    | 4   | 1.7            | 1.8                     | 1.3                           |
|                            | TITE-PIPE-C | 12                     | 72    | -     | 10    | 3   | 1.7            | 2.8                     | 1.8                           |
|                            | TITE-PIPE-O | 12                     | 70    | -     | 10    | 4   | 1.7            | 3.4                     | 2.1                           |
| 2                          | PIPE        | 12                     | 72    | -     | 10    | 4   | 1.7            | 1.8                     | 1.4                           |
|                            | TITE-PIPE-C | 13                     | 70    | -     | 9     | 4   | 1.6            | 3.9                     | 1.8                           |
|                            | TITE-PIPE-O | 13                     | 68    | -     | 9     | 4   | 1.6            | 5.7                     | 2.6                           |
| <i>Scenario G</i>          |             |                        |       |       |       |     |                |                         |                               |
| 0.5                        | PIPE        | 45                     | 38    | 16    | 1     | 0   | 2.8            | 0                       | 0                             |
|                            | TITE-PIPE-C | 44                     | 38    | 17    | 1     | 1   | 2.7            | 0                       | 0                             |
|                            | TITE-PIPE-O | 44                     | 37    | 17    | 1     | 1   | 2.7            | 0                       | 0                             |
| 1                          | PIPE        | 45                     | 38    | 16    | 1     | 0   | 2.8            | 0                       | 0                             |
|                            | TITE-PIPE-C | 44                     | 38    | 17    | 1     | 1   | 2.7            | 0                       | 0                             |
|                            | TITE-PIPE-O | 45                     | 35    | 18    | 1     | 1   | 2.7            | 0                       | 0                             |
| 2                          | PIPE        | 45                     | 38    | 16    | 1     | 0   | 2.8            | 0                       | 0                             |
|                            | TITE-PIPE-C | 45                     | 36    | 17    | 1     | 1   | 2.7            | 0                       | 0                             |
|                            | TITE-PIPE-O | 46                     | 37    | 16    | 1     | 1   | 2.7            | 0                       | 0                             |

**Table S12.** Mean trial durations per design and scenario using uniform and adaptive weight functions (assuming Weibull distributed DLT model).

| Arrival rate ( $\lambda$ ) | Design      | Scenario   |            |            |            |            |            |            |
|----------------------------|-------------|------------|------------|------------|------------|------------|------------|------------|
|                            |             | A          | B          | C          | D          | E          | F          | G          |
| <b>Uniform</b>             |             |            |            |            |            |            |            |            |
| 0.5                        | PIPE        | 79.5 (-)   | 79.6 (-)   | 78.4 (-)   | 39.2 (-)   | 79.2 (-)   | 78.8 (-)   | 79.6 (-)   |
|                            | TITE-PIPE-C | 79.0 (-1)  | 79.1 (-1)  | 78.0 (-1)  | 39.9 (2)   | 78.7 (-1)  | 78.3 (-1)  | 79.1 (-1)  |
|                            | TITE-PIPE-O | 79.0 (-1)  | 79.1 (-1)  | 76.9 (-2)  | 39.3 (0)   | 78.6 (-1)  | 77.9 (-1)  | 79.1 (-1)  |
| 1                          | PIPE        | 42.2 (-)   | 42.6 (-)   | 41.7 (-)   | 20.8 (-)   | 42.1 (-)   | 41.9 (-)   | 42.4 (-)   |
|                            | TITE-PIPE-C | 40 (-5)    | 40.1 (-6)  | 39.5 (-5)  | 20.3 (-2)  | 39.8 (-5)  | 39.6 (-6)  | 40.1 (-5)  |
|                            | TITE-PIPE-O | 39.9 (-6)  | 40.1 (-6)  | 38.9 (-7)  | 19.9 (-4)  | 39.8 (-6)  | 39.4 (-6)  | 40.0 (-6)  |
| 2                          | PIPE        | 31.0 (-)   | 31.6 (-)   | 31.0 (-)   | 15.2 (-)   | 31.0 (-)   | 31.0 (-)   | 31.2 (-)   |
|                            | TITE-PIPE-C | 20.5 (-34) | 20.6 (-35) | 20.3 (-35) | 10.7 (-30) | 20.5 (-34) | 20.4 (-34) | 20.6 (-34) |
|                            | TITE-PIPE-O | 20.4 (-34) | 20.5 (-35) | 19.9 (-36) | 10.4 (-32) | 20.3 (-35) | 20.1 (-35) | 20.5 (-34) |
| <b>Adaptive</b>            |             |            |            |            |            |            |            |            |
| 0.5                        | PIPE        | 79.5 (-)   | 79.6 (-)   | 78.4 (-)   | 39.2 (-)   | 79.2 (-)   | 78.8 (-)   | 79.6 (-)   |
|                            | TITE-PIPE-C | 79.0 (-1)  | 79.1 (-1)  | 77.9 (-1)  | 39.1 (0)   | 78.7 (-1)  | 78.3 (-1)  | 79.1 (-1)  |
|                            | TITE-PIPE-O | 78.9 (-1)  | 79.1 (-1)  | 77.3 (-1)  | 38.8 (-1)  | 78.6 (-1)  | 78.1 (-1)  | 79.1 (-1)  |
| 1                          | PIPE        | 42.2 (-)   | 42.6 (-)   | 41.7 (-)   | 20.8 (-)   | 42.1 (-)   | 41.9 (-)   | 42.4 (-)   |
|                            | TITE-PIPE-C | 40.0 (-5)  | 40.1 (-6)  | 39.4 (-5)  | 19.8 (-5)  | 39.9 (-5)  | 39.6 (-6)  | 40.1 (-5)  |
|                            | TITE-PIPE-O | 40.0 (-5)  | 40.0 (-6)  | 39.1 (-6)  | 19.4 (-7)  | 39.7 (-6)  | 39.5 (-6)  | 40.0 (-6)  |
| 2                          | PIPE        | 31.0 (-)   | 31.6 (-)   | 31.0 (-)   | 15.2 (-)   | 31.0 (-)   | 31.0 (-)   | 31.2 (-)   |
|                            | TITE-PIPE-C | 20.6 (-34) | 20.6 (-35) | 20.2 (-35) | 10.6 (-30) | 20.5 (-34) | 20.4 (-34) | 20.6 (-34) |
|                            | TITE-PIPE-O | 20.5 (-34) | 20.5 (-35) | 20.0 (-35) | 10.3 (-33) | 20.3 (-34) | 20.2 (-35) | 20.5 (-34) |
